# Supplementary material for: Upconversion Nanophosphor-Involved Molecularly Imprinted Fluorescent Polymers for Sensitive and Specific Recognition of Sterigmatocystin
Source: PubMed Central journal article supplement (PMC6432482; doi:10.3390/polym9070299), 2017-07-22
Supplement: polymers-09-00299-s001.pdf [file polymers-09-00299-s001.pdf]

## Supporting Information

### Upconversion Nanophosphor-Involved Molecularly Imprinted Fluorescent Polymers for Sensitive and Specific Recognition of Sterigmatocystin

Jing-Min Liu<sup>1,2</sup>, Feng-Zhen Cao<sup>3</sup>, Guo-Zhen Fang<sup>3</sup>, and Shuo Wang<sup>1,2\*</sup>

<sup>1</sup> Beijing Advanced Innovation Center for Food Nutrition and Human Health,  
Beijing Technology & Business University (BTBU), Beijing, 100048, China

<sup>2</sup> School of Medicine, Nankai University, Tianjin, 300071, China

<sup>3</sup> Key Laboratory of Food Nutrition and Safety, Ministry of Education, Tianjin  
University of Science and Technology, Tianjin, 300457, China

\* Correspondence: wangshuo@nankai.edu.cn; Tel.: +86-22-60912490

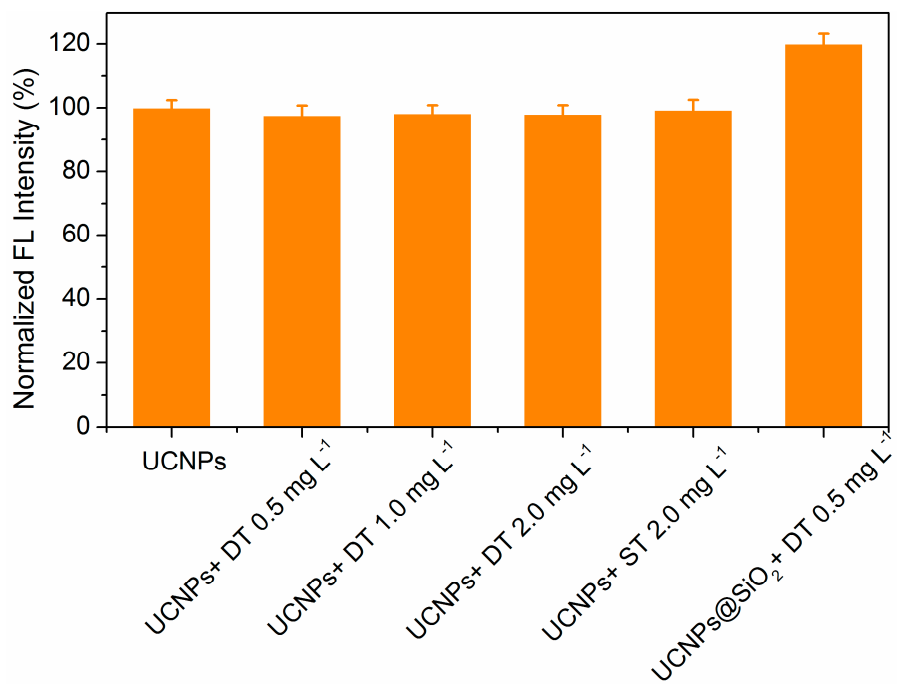

**Figure. S1** Comparison of UCNPs intensity for interaction with DT/ST with or without the silica coating.
